# Supplementary material for: Comparison of the mammalian insulin signalling pathway to invertebrates in the context of FOXO-mediated ageing
Source: PubMed Central journal article supplement — Bioinformatics. 2014 Jul 26;30(21):2999–3003. doi: 10.1093/bioinformatics/btu493 (PMC4201157; doi:10.1093/bioinformatics/btu493), 2014-07-26
Supplement: supp_btu493_suppl_info.pdf [file supp_btu493_suppl_info.pdf]

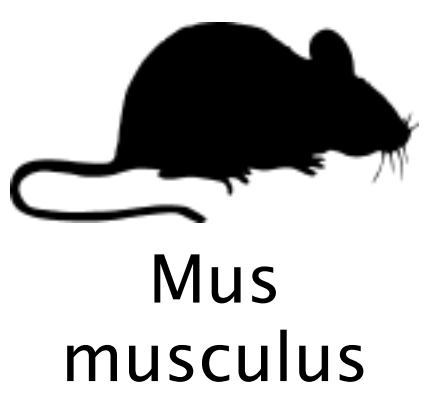

Mus musculus

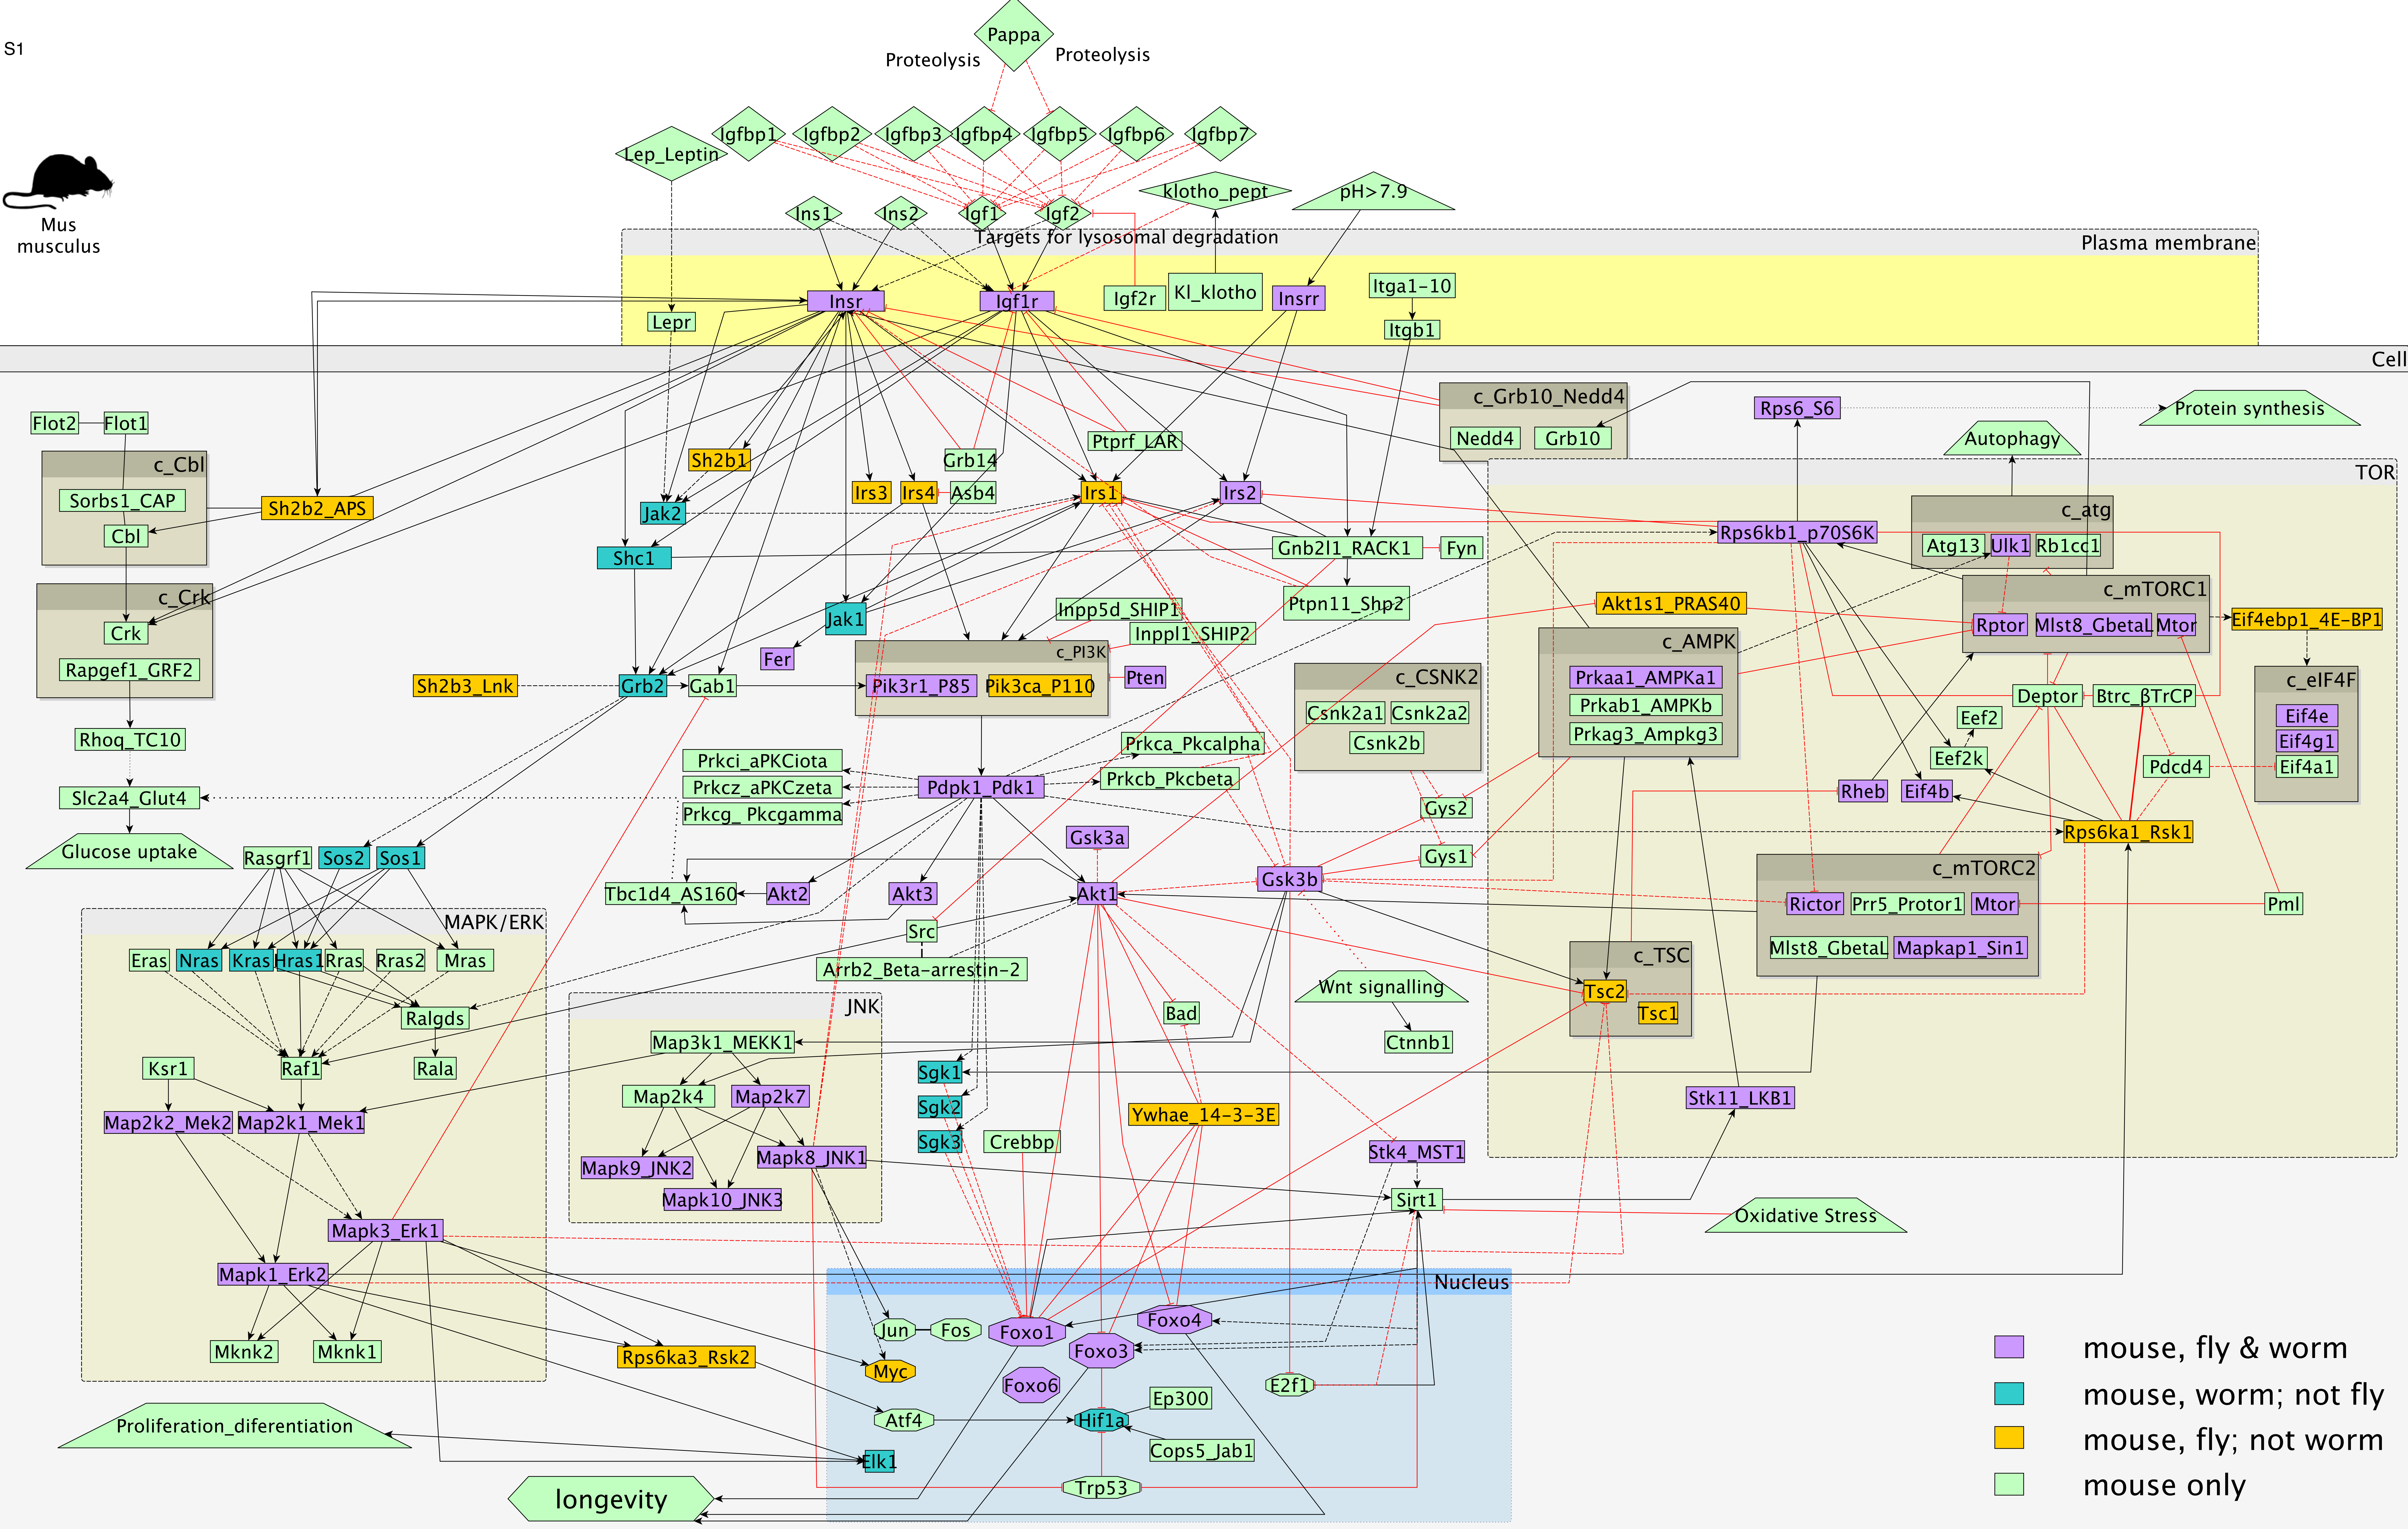

- mouse, fly & worm
- mouse, worm; not fly
- mouse, fly; not worm
- mouse only

| Mouse                          | Fly                           | Worm                       | Note                                                                                                      | Pathway |
|--------------------------------|-------------------------------|----------------------------|-----------------------------------------------------------------------------------------------------------|---------|
| NA                             | ImpL2                         | zig-2,zig-3,zig-4          | worm genes not in pathway                                                                                 | IIS     |
| Ins1, Ins2, Igf1, Igf2         | Ilp1, ... Ilp7                | ins-1, ... ins-40          | non-orthologues                                                                                           | IIS     |
| Insr, Insr, Igf1r              | InR                           | daf-2                      |                                                                                                           | IIS     |
| Irs1, Irs2, Irs3, Irs4         | chico                         | ist-1                      | worm insulin receptor substrate homologue from OrthoDB                                                    | IIS     |
| Sh2b1, Sh2b2, Sh2b3            | Lnk                           | NA                         |                                                                                                           | IIS     |
| Pik3cd, Pik3cb, Pik3ca, Pik3cg | Pi3K68D, Pi3K92E              | age-1                      | age-1 is orthologue to the fly gene and the human PIK3CA (TreeFam). The fly gene is absent from the model | IIS     |
| Pik3r1, Pik3r2, Pik3r3         | Pi3K21B                       | aap-1                      |                                                                                                           | IIS     |
| Pdpk1                          | Pk61C                         | pdk-1                      |                                                                                                           | IIS     |
| Akt1, ..., Akt3                | Akt1                          | akt-1, akt-2               |                                                                                                           | IIS     |
| Sgk1, ..., Sgk3                | NA                            | sgk-1                      |                                                                                                           | IIS     |
| Foxo1, Foxo3, Foxo4, Foxo6     | foxo                          | daf-16                     |                                                                                                           | IIS     |
| Ywhae                          | 14-3-3epsilon                 | ftt-2, par-5               |                                                                                                           | IIS     |
| Vep1                           | melt                          | K10B4.3                    | gene not in the worm/mouse pathway                                                                        | IIS     |
| Stk3, Stk4                     | hpo                           | cst-1, cst-2               |                                                                                                           | IIS     |
| Phlpp1, Phlpp2                 | Phlpp                         | F43C1.1                    | gene not in the worm/mouse pathway                                                                        | IIS     |
| NA                             | wdp                           | NA                         |                                                                                                           | IIS     |
| Pten                           | Pten                          | daf-18                     |                                                                                                           | IIS     |
| NA                             | B4                            | NA                         |                                                                                                           | IIS     |
| Cyth1, ..., Cyth4              | step                          | grp-1                      | gene not in the worm/mouse pathway                                                                        | IIS     |
| Grb2                           | drk                           | sem-5                      | fly gene not in pathway                                                                                   | IIS     |
| Gnb2l1                         | Rack1                         | rack-1                     | only in mouse pathway                                                                                     | IIS     |
| mTor                           | Tor                           | let-363                    | worm Tor orthologue identified through Treefam (not compara)                                              | TOR     |
| Ulk1                           | Atg1                          | unc-51                     |                                                                                                           | TOR     |
| Eif4b                          | eIF-4B                        | drr-2, H05C05.1            | phylome orthology                                                                                         | TOR     |
| Nup62                          | Nup62                         | unc-14                     | fly and mouse genes not in pathway models                                                                 | TOR     |
| Rps6                           | RpS6                          | rps-6                      |                                                                                                           | TOR     |
| Rheb                           | Rheb                          | rheb-1                     |                                                                                                           | TOR     |
| Akt1s1                         | L                             | NA                         | orthologue present only in phylome orthology                                                              | TOR     |
| Ddit4, Ddit4l                  | scyl                          | NA                         | only in the fly pathway                                                                                   | TOR     |
| Ddit4, Ddit4l                  | chrb                          | NA                         | only in the fly pathway                                                                                   | TOR     |
| Prkaa1                         | SNF1A                         | aak-2                      |                                                                                                           | TOR     |
| Stk11                          | lkb1                          | par-4                      |                                                                                                           | TOR     |
| Tsc2                           | gig                           | NA                         |                                                                                                           | TOR     |
| Tsc1                           | Tsc1                          | NA                         |                                                                                                           | TOR     |
| Casp9                          | Dredd                         | ced-3                      | only in fly pathway                                                                                       | TOR     |
| Rraga, Rragb                   | RagA                          | raga-1                     | not in mouse pathway                                                                                      | TOR     |
| Rragc, Rragd                   | RagC                          | ragc-1                     | only in fly pathway                                                                                       | TOR     |
| Rptor                          | raptor                        | daf-15                     |                                                                                                           | TOR     |
| Mlst8                          | Lst8                          | C10H11.8                   |                                                                                                           | TOR     |
| Mapkap1                        | Sin1                          | sinh-1                     |                                                                                                           | TOR     |
| Rictor                         | rictor                        | rict-1                     |                                                                                                           | TOR     |
| Rps6kb1, Rps6kb2               | S6k                           | rsk-1                      |                                                                                                           | TOR     |
| Eif4g3, Eif4g1                 | eIF4G                         | ifg-1                      |                                                                                                           | TOR     |
| Eef2k                          | NA                            | efk-1                      | absent in fly, not in worm pathway                                                                        | TOR     |
| Crtc1                          | TORC                          | crtc-1                     | only in fly pathway                                                                                       | TOR     |
| Eif4ebp1, Eif4ebp2, Eif4ebp3   | Thor                          | NA                         |                                                                                                           | TOR     |
| Sik1, Sik2                     | CG4290                        | kin-29                     | only in fly pathway                                                                                       | TOR     |
| Eif4e                          | eIF-4E, eIF4E-3, ..., eIF4E-7 | ife-1, ife-2, ife-3, ife-5 |                                                                                                           | TOR     |



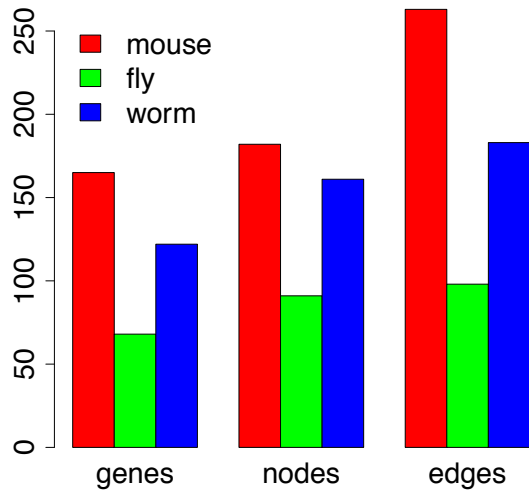

S3.A Histogram comparing the numbers of genes, nodes and edges present in the curated models of the IIS/TOR pathways in each of the three organisms.

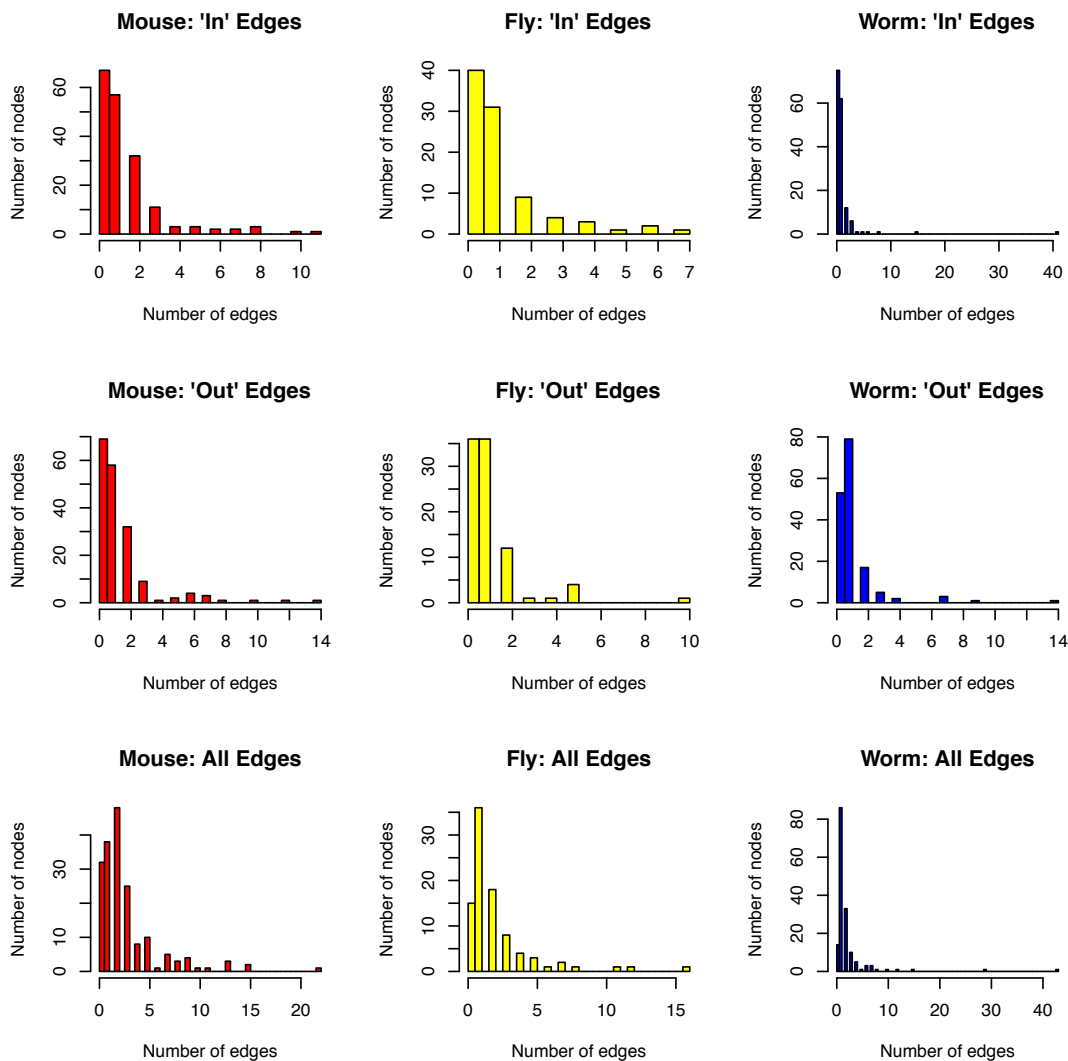

S3.B Comparing the distribution of number of edges per node in each organism. The comparison is done for “in-bound” edges, “out-bound” edges and “all” edges.

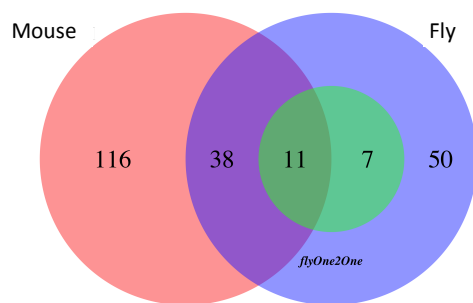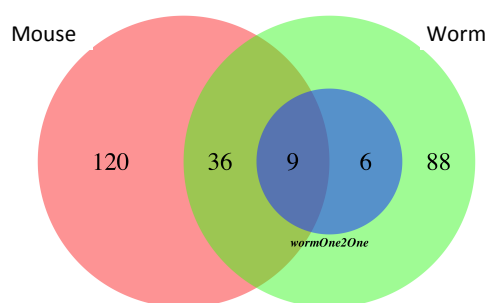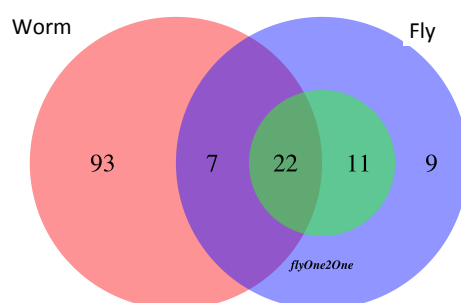

S3.C Venn diagrams comparing the orthologues of the different species within the pathway models. For each diagram the circle on the left-hand-side shows the number of genes present in the pathway of a particular organism. The circle on the right hand-side shows all orthologous genes that are present in the pathway of the other organism. Inner circles distinguish the one-to-one orthologues between each pair of organisms.

| organism | cross-talk type | interactions                                 | multiple gene copies |
|----------|-----------------|----------------------------------------------|----------------------|
| mouse    | MAPK/ERK to IIS | Mapk3 -  Gab1 -> Pi3k                        | NO                   |
| fly      | MAPK/ERK to IIS | orthologues exist, but no interactions found | NO                   |
| worm     | MAPK/ERK to IIS | no orthologue for Gab1                       | NO                   |
| mouse    | IIS to MAPK/ERK | Grb2 -> Sos1                                 | NO                   |
| fly      | IIS to MAPK/ERK | orthologues exist, but no interactions found | NO                   |
| worm     | IIS to MAPK/ERK | orthologues exist, but no interactions found | NO                   |
| mouse    | IIS to MAPK/ERK | src -> Raf1                                  | NO                   |
| fly      | IIS to MAPK/ERK | no orthologue for src                        | NA                   |
| worm     | IIS to MAPK/ERK | no orthologue for src                        | NA                   |

|       |                 |                                                                                  |     |
|-------|-----------------|----------------------------------------------------------------------------------|-----|
| mouse | MAPK/ERK to TOR | Mapk1 -> Rps6ka1                                                                 | NO  |
| fly   | MAPK/ERK to TOR | orthologues exist, but no interactions found                                     | NO  |
| worm  | MAPK/ERK to TOR | mpk-1 - rskn-1 (physical, unidirectional from Y2H screen, Li et al Science 2004) | NO  |
|       |                 |                                                                                  |     |
| mouse | IIS to JNK      | Gsk3b -> Map3k1/Map3k4                                                           | NO  |
| fly   | IIS to JNK      | orthologues exist, but no interactions found                                     | NO  |
| worm  | IIS to JNK      | orthologues exist, but no interactions found                                     | NO  |
|       |                 |                                                                                  |     |
| mouse | JNK to IIS      | Mapk8 -  Irs1/Irs2                                                               | YES |
| fly   | JNK to IIS      | bsk -  chico                                                                     | NO  |
| worm  | JNK to IIS      | jnk-1 -  ist-1                                                                   | NO  |
|       |                 |                                                                                  |     |
| mouse | IIS to TOR      | Akt1 -  Akt1s1                                                                   | YES |
| fly   | IIS to TOR      | Akt1 -  L                                                                        | NO  |
| worm  | IIS to TOR      | no orthologue for Akt1s1                                                         | NA  |
|       |                 |                                                                                  |     |
| mouse | IIS to TOR      | Akt1 -  Tsc2                                                                     | YES |
| fly   | IIS to TOR      | Akt1 -  gig                                                                      | NO  |
| worm  | IIS to TOR      | no orthologue for Tsc2                                                           | NA  |
|       |                 |                                                                                  |     |
| mouse | IIS to TOR      | Gsk3b -  Tsc2                                                                    | NO  |
| fly   | IIS to TOR      | sgg -  gig                                                                       | NO  |
| worm  | IIS to TOR      | no orthologue for Tsc2                                                           | NA  |
|       |                 |                                                                                  |     |
| mouse | TOR to IIS      | AMPK -> Insr                                                                     | NO  |
| fly   | TOR to IIS      | orthologues exist, but no interactions found                                     | NO  |
| worm  | TOR to IIS      | orthologues exist, but no interactions found                                     | NO  |
|       |                 |                                                                                  |     |
| mouse | TOR to IIS      | Rps6kb1 -  Irs1                                                                  | YES |
| fly   | TOR to IIS      | S6k -  chico                                                                     | NO  |
| worm  | TOR to IIS      | orthologues exist, but no interactions found                                     | NO  |
|       |                 |                                                                                  |     |
| mouse | TOR to IIS      | TORC2 -> Akt1                                                                    | YES |
| fly   | TOR to IIS      | TORC2 -> Akt1                                                                    | NO  |
| worm  | TOR to IIS      | TORC2 -> akt-1                                                                   | YES |

S3.D Table summarising cross-talk points between pathways within the mouse model, the existence of similar interactions between orthologues in flies and worms and whether a cross-talk point involves a gene with multiple copies.

# S4. Results on Ins1 and Irs1 in all three organisms

MOUSE Reducing Longevity (Ins1)-similar for Ins2  
 Ins1 ↓ Igf1r ↓ Gnb21\_RA Src ↑ Akt1 ↑ Foxo4 ↓ longevity ↓  
 Ins1 ↓ Igf1r ↓ Gnb21\_RA Src ↑ Akt1 ↑ Foxo3 ↓ longevity ↓  
 Ins1 ↓ Igf1r ↓ Gnb21\_RA Src ↑ Akt1 ↑ Foxo1 ↓ longevity ↓

MOUSE Extending Longevity (Ins1)-similar for Ins2  
 Ins1 ↓ Igf1r ↓ Irs1 ↓ c\_PI3K ↓ Pdpk1\_Pdk Sgk3 ↓ Foxo1 ↑ longevity ↑  
 Ins1 ↓ Insr ↓ Irs4 ↓ c\_PI3K ↓ Pdpk1\_Pdk Akt1 ↓ Foxo1 ↑ longevity ↑  
 Ins1 ↓ Igf1r ↓ Irs1 ↓ c\_PI3K ↓ Pdpk1\_Pdk Akt1 ↓ Foxo4 ↑ longevity ↑  
 Ins1 ↓ Igf1r ↓ Irs2 ↓ c\_PI3K ↓ Pdpk1\_Pdk Akt1 ↓ Foxo4 ↑ longevity ↑  
 Ins1 ↓ Insr ↓ Irs4 ↓ c\_PI3K ↓ Pdpk1\_Pdk Akt1 ↓ Foxo4 ↑ longevity ↑  
 Ins1 ↓ Insr ↓ Irs1 ↓ c\_PI3K ↓ Pdpk1\_Pdk Akt1 ↓ Foxo4 ↑ longevity ↑  
 Ins1 ↓ Insr ↓ Irs1 ↓ c\_PI3K ↓ Pdpk1\_Pdk Sgk2 ↓ Foxo1 ↑ longevity ↑  
 Ins1 ↓ Insr ↓ Irs4 ↓ c\_PI3K ↓ Pdpk1\_Pdk Sgk2 ↓ Foxo1 ↑ longevity ↑  
 Ins1 ↓ Insr ↓ Irs1 ↓ c\_PI3K ↓ Pdpk1\_Pdk Akt1 ↓ Foxo1 ↑ longevity ↑  
 Ins1 ↓ Igf1r ↓ Irs2 ↓ c\_PI3K ↓ Pdpk1\_Pdk Sgk3 ↓ Foxo1 ↑ longevity ↑  
 Ins1 ↓ Insr ↓ Irs4 ↓ c\_PI3K ↓ Pdpk1\_Pdk Sgk1 ↓ Foxo1 ↑ longevity ↑  
 Ins1 ↓ Igf1r ↓ Irs1 ↓ c\_PI3K ↓ Pdpk1\_Pdk Sgk1 ↓ Foxo1 ↑ longevity ↑  
 Ins1 ↓ Igf1r ↓ Irs2 ↓ c\_PI3K ↓ Pdpk1\_Pdk Sgk2 ↓ Foxo1 ↑ longevity ↑  
 Ins1 ↓ Insr ↓ Irs1 ↓ c\_PI3K ↓ Pdpk1\_Pdk Akt1 ↓ Foxo3 ↑ longevity ↑  
 Ins1 ↓ Igf1r ↓ Irs1 ↓ c\_PI3K ↓ Pdpk1\_Pdk Akt1 ↓ Foxo1 ↑ longevity ↑  
 Ins1 ↓ Igf1r ↓ Irs2 ↓ c\_PI3K ↓ Pdpk1\_Pdk Akt1 ↓ Foxo1 ↑ longevity ↑  
 Ins1 ↓ Igf1r ↓ Irs2 ↓ c\_PI3K ↓ Pdpk1\_Pdk Sgk1 ↓ Foxo1 ↑ longevity ↑  
 Ins1 ↓ Insr ↓ Irs4 ↓ c\_PI3K ↓ Pdpk1\_Pdk Akt1 ↓ Foxo3 ↑ longevity ↑  
 Ins1 ↓ Insr ↓ Irs1 ↓ c\_PI3K ↓ Pdpk1\_Pdk Sgk1 ↓ Foxo1 ↑ longevity ↑  
 Ins1 ↓ Igf1r ↓ Irs1 ↓ c\_PI3K ↓ Pdpk1\_Pdk Sgk1 ↓ Foxo1 ↑ longevity ↑  
 Ins1 ↓ Insr ↓ Irs4 ↓ c\_PI3K ↓ Pdpk1\_Pdk Sgk3 ↓ Foxo1 ↑ longevity ↑  
 Ins1 ↓ Insr ↓ Irs1 ↓ c\_PI3K ↓ Pdpk1\_Pdk Sgk3 ↓ Foxo1 ↑ longevity ↑  
 Ins1 ↓ Igf1r ↓ Irs1 ↓ c\_PI3K ↓ Pdpk1\_Pdk Sgk2 ↓ Foxo1 ↑ longevity ↑  
 Ins1 ↓ Igf1r ↓ Irs2 ↓ c\_PI3K ↓ Pdpk1\_Pdk Akt1 ↓ Foxo3 ↑ longevity ↑

MOUSE Reducing Longevity (Irs1)-similar for Irs2  
 Irs1 ↓ c\_PI3K ↓ Pdpk1\_Pdk Prkca\_Pkcalpha ↓ Gsk3b ↑ E2f1 ↓ Sirt1 ↓ Foxo3 ↓ longevity ↓  
 Irs1 ↓ c\_PI3K ↓ Pdpk1\_Pdk Rps6kb1\_p70S6K ↓ Gsk3b ↑ E2f1 ↓ Sirt1 ↓ Foxo4 ↓ longevity ↓  
 Irs1 ↓ c\_PI3K ↓ Pdpk1\_Pdk Rps6kb1\_p70S6K ↓ Gsk3b ↑ E2f1 ↓ Sirt1 ↓ Foxo1 ↓ longevity ↓  
 Irs1 ↓ c\_PI3K ↓ Pdpk1\_Pdk Prkcb\_Pkcbeta ↓ Gsk3b ↑ E2f1 ↓ Sirt1 ↓ Foxo1 ↓ longevity ↓  
 Irs1 ↓ c\_PI3K ↓ Pdpk1\_Pdk Prkcb\_Pkcbeta ↓ Gsk3b ↑ E2f1 ↓ Sirt1 ↓ Foxo4 ↓ longevity ↓  
 Irs1 ↓ c\_PI3K ↓ Pdpk1\_Pdk Akt1 ↓ Gsk3b ↑ E2f1 ↓ Sirt1 ↓ Foxo4 ↓ longevity ↓  
 Irs1 ↓ c\_PI3K ↓ Pdpk1\_Pdk Rps6kb1\_p70S6K ↓ Gsk3b ↑ E2f1 ↓ Sirt1 ↓ Foxo3 ↓ longevity ↓  
 Irs1 ↓ c\_PI3K ↓ Pdpk1\_Pdk Akt1 ↓ Gsk3b ↑ E2f1 ↓ Sirt1 ↓ Foxo1 ↓ longevity ↓  
 Irs1 ↓ c\_PI3K ↓ Pdpk1\_Pdk Prkcb\_Pkcbeta ↓ Gsk3b ↑ E2f1 ↓ Sirt1 ↓ Foxo3 ↓ longevity ↓  
 Irs1 ↓ c\_PI3K ↓ Pdpk1\_Pdk Prkca\_Pkcalpha ↓ Gsk3b ↑ E2f1 ↓ Sirt1 ↓ Foxo1 ↓ longevity ↓  
 Irs1 ↓ c\_PI3K ↓ Pdpk1\_Pdk Akt1 ↓ Gsk3b ↑ E2f1 ↓ Sirt1 ↓ Foxo3 ↓ longevity ↓  
 Irs1 ↓ c\_PI3K ↓ Pdpk1\_Pdk Prkca\_Pkcalpha ↓ Gsk3b ↑ E2f1 ↓ Sirt1 ↓ Foxo4 ↓ longevity ↓

MOUSE Extending Longevity (Irs1)-similar for Irs2  
 Irs1 ↓ c\_PI3K ↓ Pdpk1\_Pdk Akt1 ↓ Foxo3 ↑ longevity ↑  
 Irs1 ↓ c\_PI3K ↓ Pdpk1\_Pdk Sgk1 ↓ Foxo1 ↑ longevity ↑  
 Irs1 ↓ c\_PI3K ↓ Pdpk1\_Pdk Sgk3 ↓ Foxo1 ↑ longevity ↑  
 Irs1 ↓ c\_PI3K ↓ Pdpk1\_Pdk Akt1 ↓ Foxo4 ↑ longevity ↑  
 Irs1 ↓ c\_PI3K ↓ Pdpk1\_Pdk Sgk2 ↓ Foxo1 ↑ longevity ↑  
 Irs1 ↓ c\_PI3K ↓ Pdpk1\_Pdk Akt1 ↓ Foxo1 ↑ longevity ↑

FLY Reducing Longevity (Ilp1)-similar for Ilp2-7  
 Ilp1 ↓ InR ↓ Lnk\_dSH2B ↓ c\_PI3K ↓ Pk61C\_dPDK S6k ↓ chico\_IRS ↑ c\_PI3K ↑ Akt1\_PKB ↑ foxo ↓ longevity ↓  
 Ilp1 ↓ InR ↓ chico\_IRS ↓ c\_PI3K ↓ Pk61C\_dPDK S6k ↓ chico\_IRS ↑ c\_PI3K ↑ Akt1\_PKB ↑ foxo ↓ longevity ↓

FLY Extending Longevity (Ilp1)-similar for Ilp2-7  
 Ilp1 ↓ InR ↓ Lnk\_dSH2B c\_PI3K ↓ Akt1\_PKB ↓ foxo ↑ longevity ↑  
 Ilp1 ↓ InR ↓ chico\_IRS ↓ c\_PI3K ↓ Akt1\_PKB ↓ foxo ↑ longevity ↑

FLY Reducing Longevity (chico)  
 chico\_IRS ↓ c\_PI3K ↓ Akt1\_PKB ↓ L\_PRAS40 ↑ c\_Tor\_C1 ↓ c\_Tor\_C2 ↑ Akt1\_PKB ↑ foxo ↓ longevity ↓

FLY Extending Longevity (chico)  
 chico\_IRS ↓ c\_PI3K ↓ Akt1\_PKB ↓ foxo ↑ longevity ↑

WORM Reducing Longevity (ins-1)-similar for ins-2:ins-40  
 ins\_1 ↓ daf\_2 ↓ ist\_1 ↓ let\_60 ↓ skn\_1 ↓ longevity ↓

WORM Extending Longevity (ins-1)-similar for ins-2:ins-40  
 ins\_1 ↓ daf\_2 ↓ ist\_1 ↓ daf\_16 ↑ longevity ↑

WORM Reducing Longevity (ist-1)  
 ist\_1 ↓ let\_60 ↓ skn\_1 ↓ longevity ↓

WORM Extending Longevity (ist-1)  
 ist\_1 ↓ daf\_16 ↑ longevity ↑











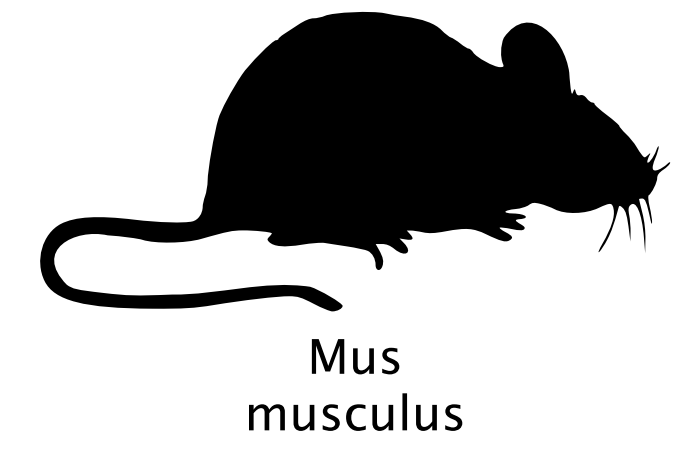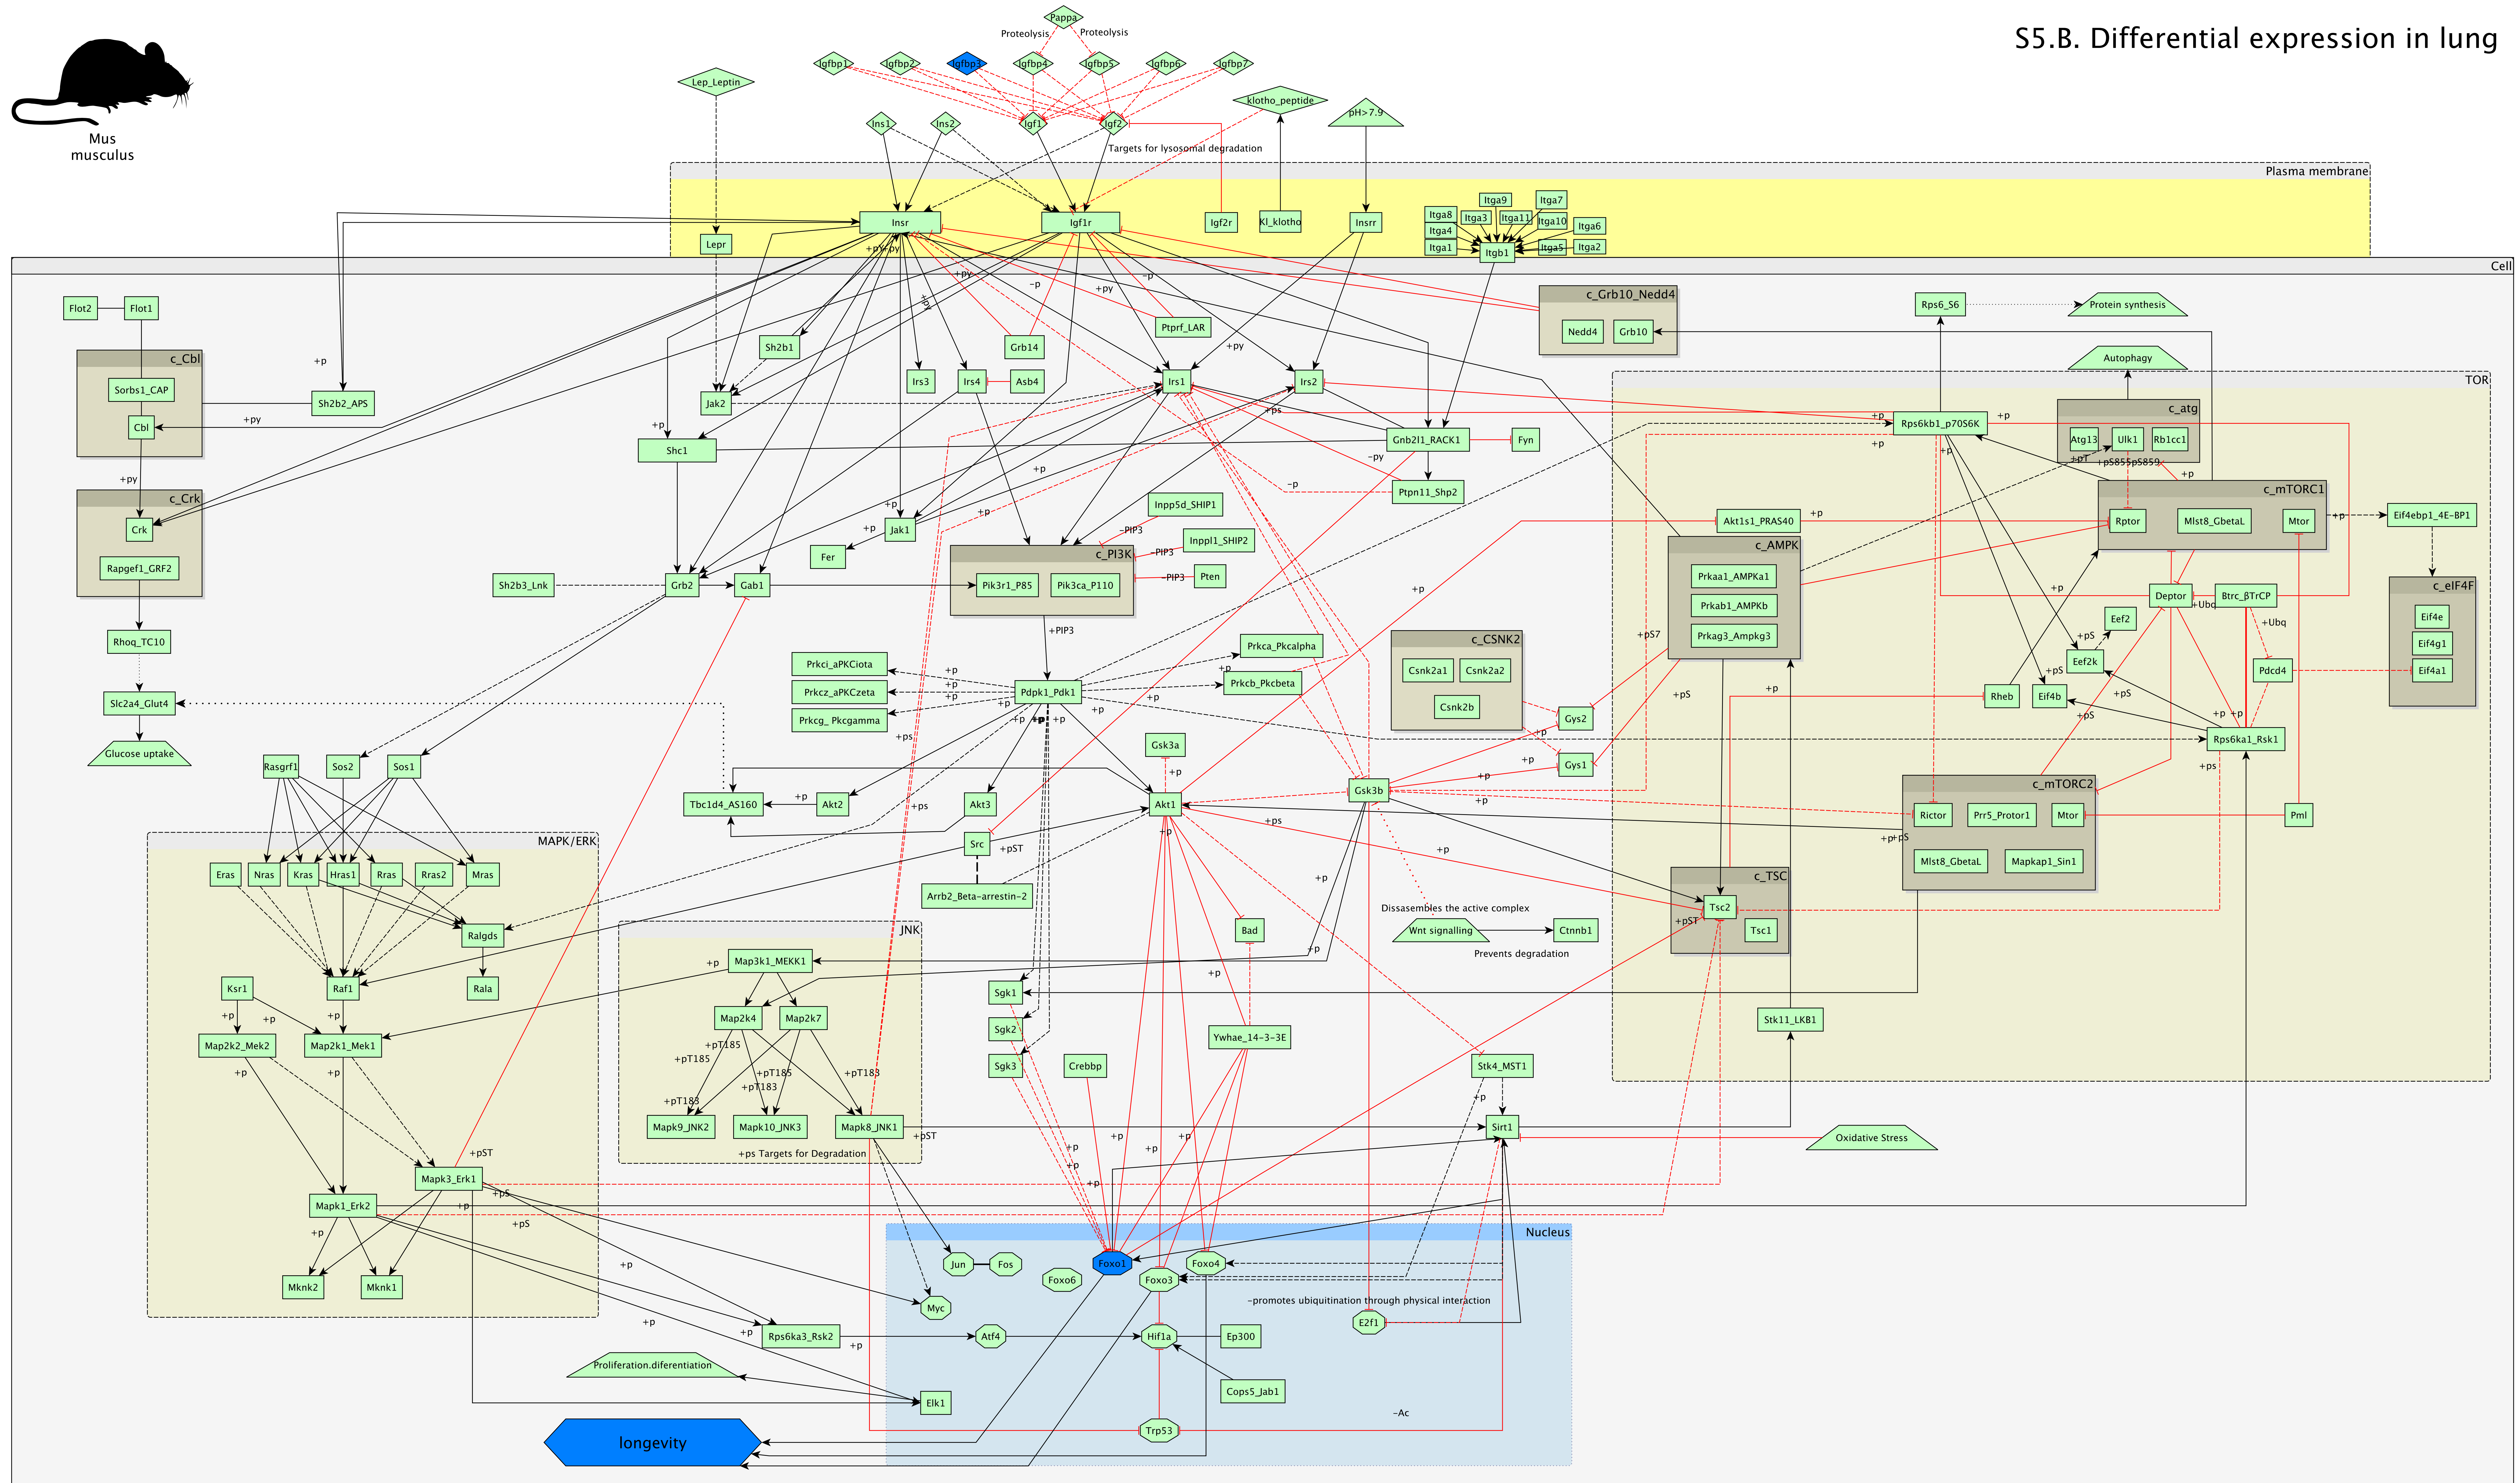







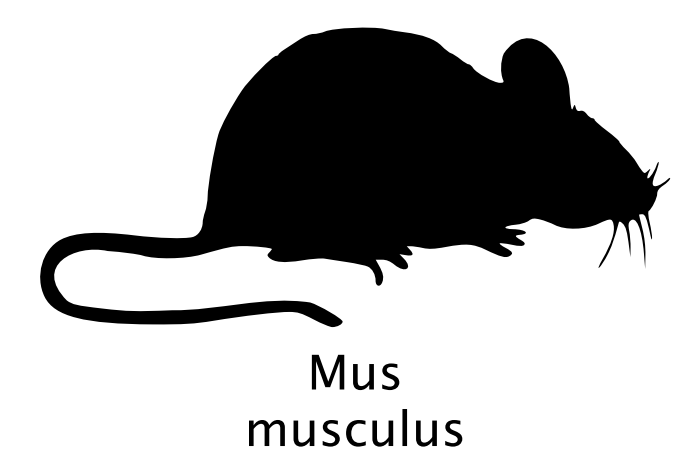

# S5.C. Differential expression in thymus

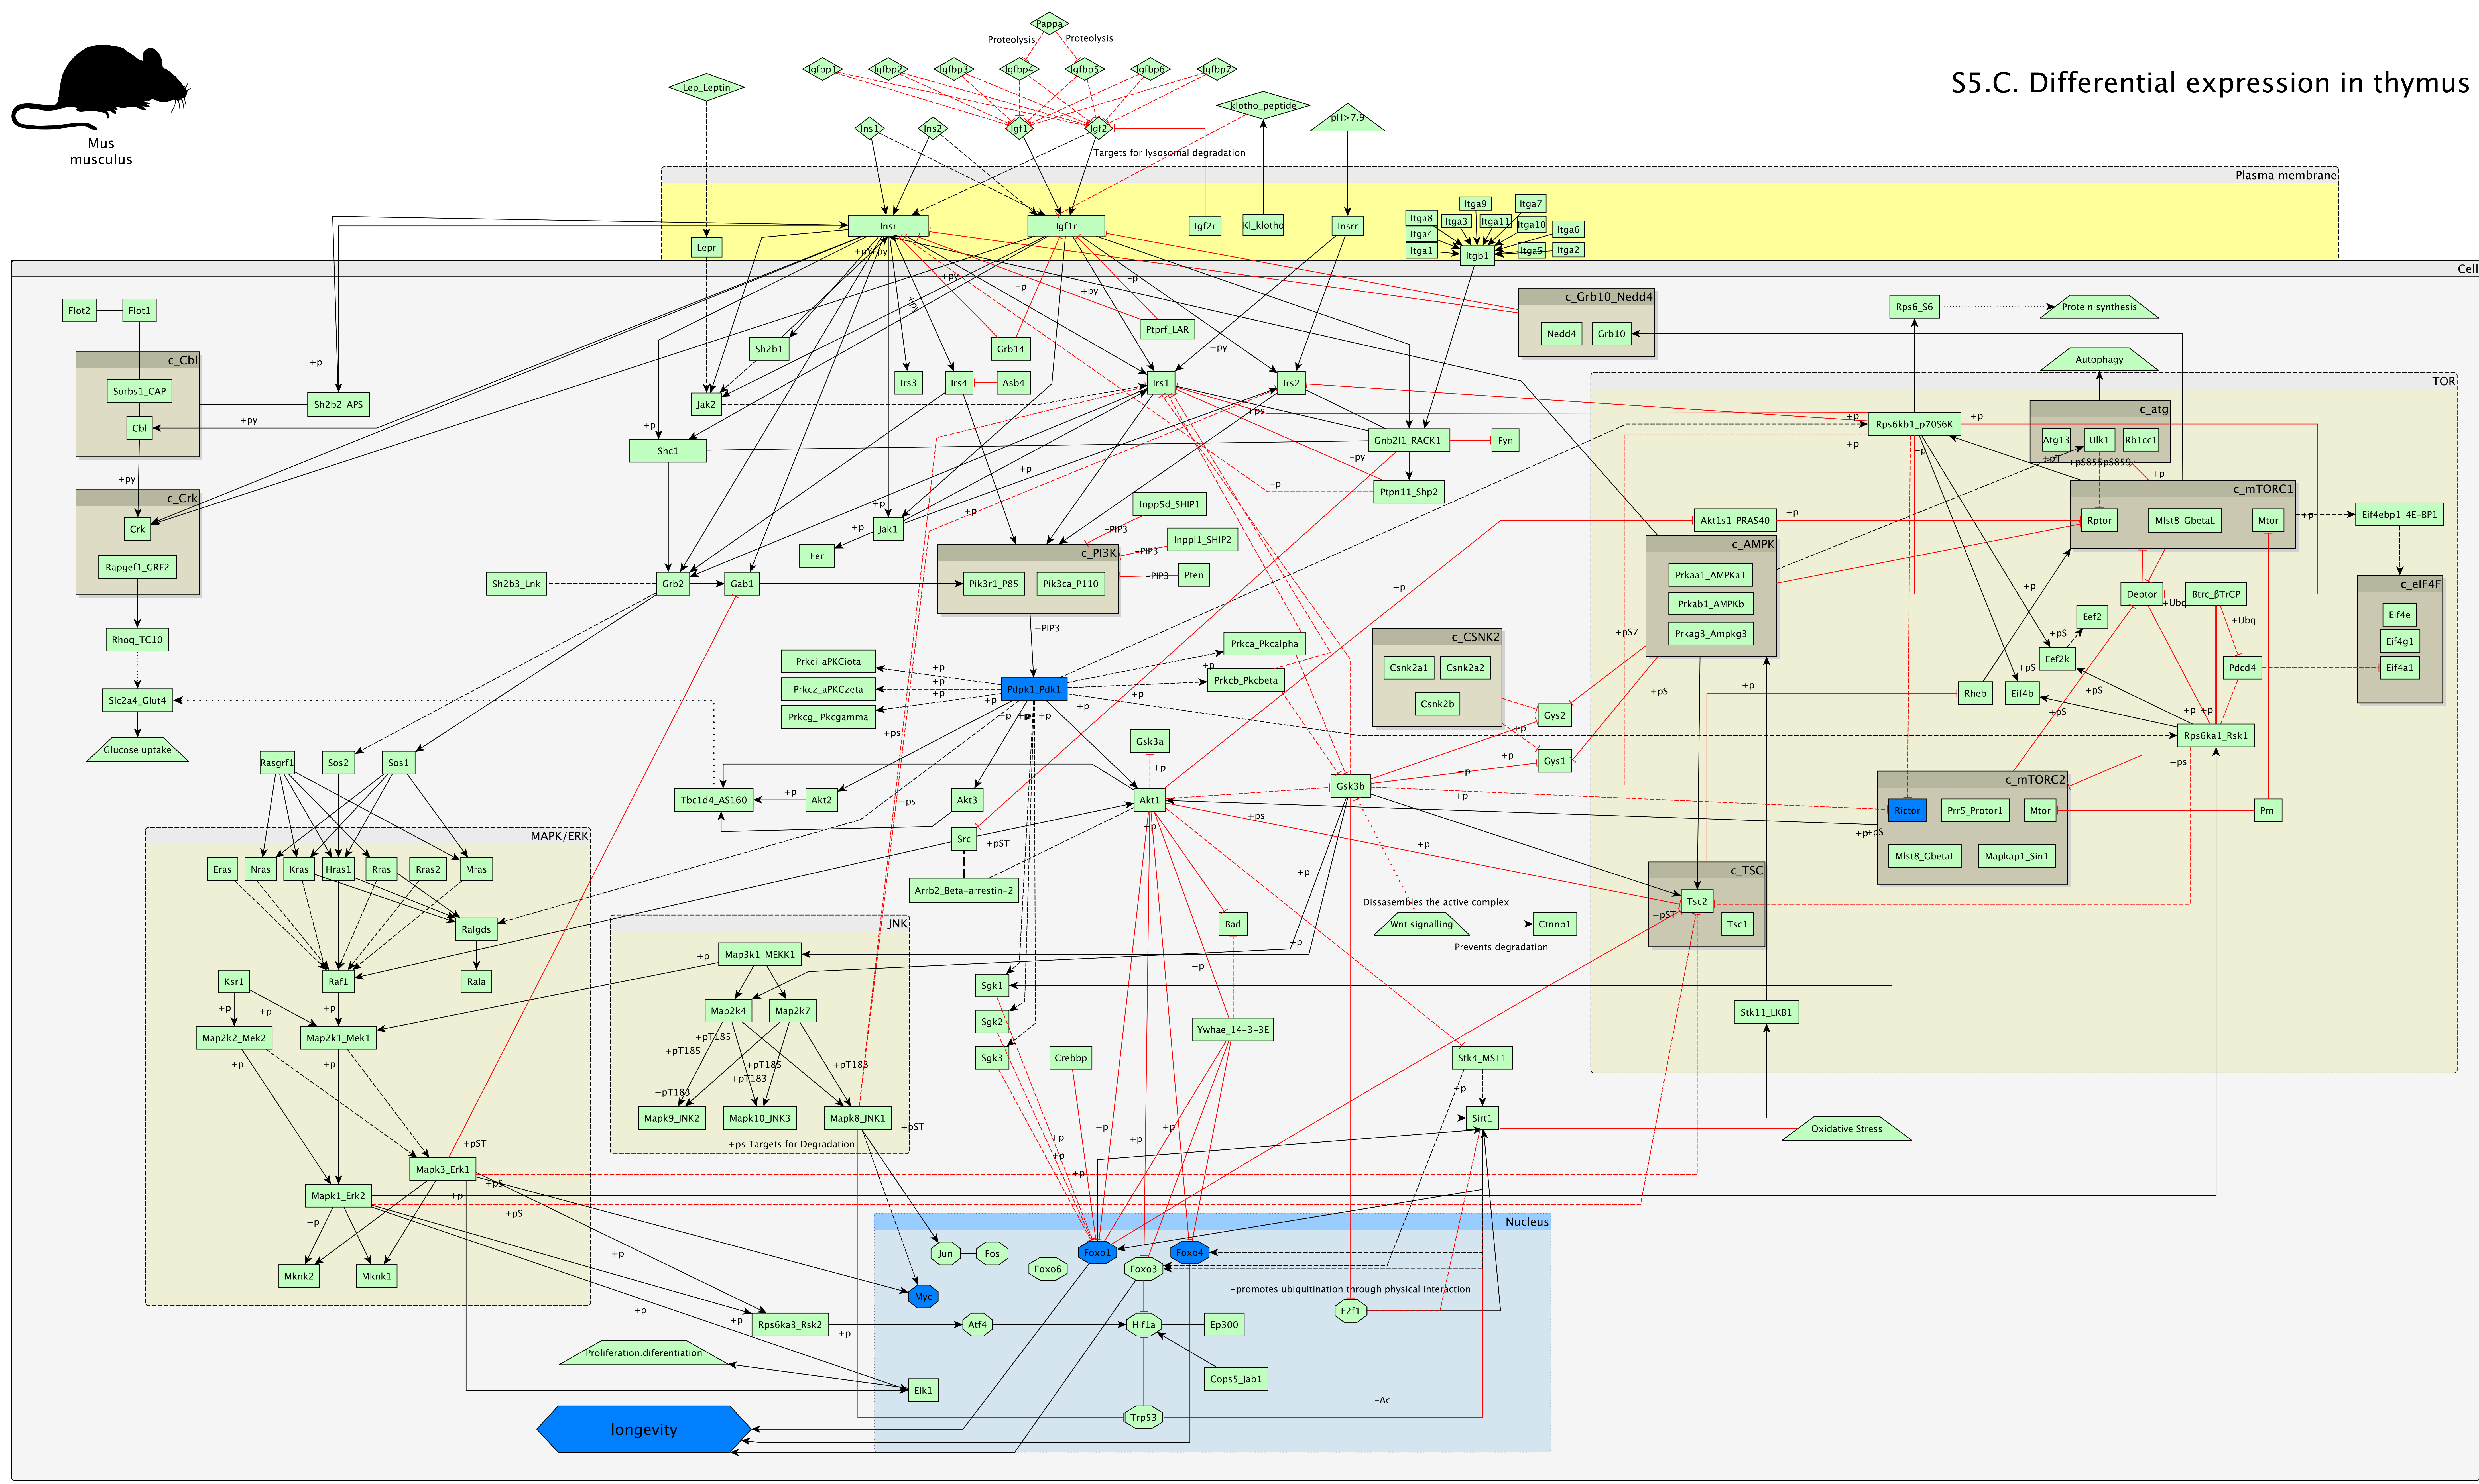

## Thymus Results

|          |                 |         |        |         |         |             |
|----------|-----------------|---------|--------|---------|---------|-------------|
| Rictor ↓ | c_mTORC2 Akt1 ↓ | Gsk3b ↑ | E2f1 ↓ | Sirt1 ↓ | Foxo4 ↓ | longevity ↓ |
| Rictor ↓ | c_mTORC2 Akt1 ↓ | Gsk3b ↑ | E2f1 ↓ | Sirt1 ↓ | Foxo1 ↓ | longevity ↓ |
| Rictor ↓ | c_mTORC2 Akt1 ↓ | Gsk3b ↑ | E2f1 ↓ | Sirt1 ↓ | Foxo3 ↓ | longevity ↓ |

Foxo1 ↓    longevity ↓

|                      |         |        |         |         |             |
|----------------------|---------|--------|---------|---------|-------------|
| Pdpk1_Pdk Rps6kb1_p  | Gsk3b ↑ | E2f1 ↓ | Sirt1 ↓ | Foxo1 ↓ | longevity ↓ |
| Pdpk1_Pdk Prkcb_Pkcb | Gsk3b ↑ | E2f1 ↓ | Sirt1 ↓ | Foxo4 ↓ | longevity ↓ |
| Pdpk1_Pdk Rps6kb1_p  | Gsk3b ↑ | E2f1 ↓ | Sirt1 ↓ | Foxo4 ↓ | longevity ↓ |
| Pdpk1_Pdk Prkca_Pkca | Gsk3b ↑ | E2f1 ↓ | Sirt1 ↓ | Foxo3 ↓ | longevity ↓ |
| Pdpk1_Pdk Prkcb_Pkcb | Gsk3b ↑ | E2f1 ↓ | Sirt1 ↓ | Foxo1 ↓ | longevity ↓ |
| Pdpk1_Pdk Akt1 ↓     | Gsk3b ↑ | E2f1 ↓ | Sirt1 ↓ | Foxo3 ↓ | longevity ↓ |
| Pdpk1_Pdk Prkcb_Pkcb | Gsk3b ↑ | E2f1 ↓ | Sirt1 ↓ | Foxo3 ↓ | longevity ↓ |
| Pdpk1_Pdk Prkca_Pkca | Gsk3b ↑ | E2f1 ↓ | Sirt1 ↓ | Foxo4 ↓ | longevity ↓ |
| Pdpk1_Pdk Prkca_Pkca | Gsk3b ↑ | E2f1 ↓ | Sirt1 ↓ | Foxo1 ↓ | longevity ↓ |
| Pdpk1_Pdk Akt1 ↓     | Gsk3b ↑ | E2f1 ↓ | Sirt1 ↓ | Foxo1 ↓ | longevity ↓ |
| Pdpk1_Pdk Akt1 ↓     | Gsk3b ↑ | E2f1 ↓ | Sirt1 ↓ | Foxo4 ↓ | longevity ↓ |
| Pdpk1_Pdk Rps6kb1_p  | Gsk3b ↑ | E2f1 ↓ | Sirt1 ↓ | Foxo3 ↓ | longevity ↓ |

Foxo4 ↓    longevity ↓

Pdpk1\_Pdk Akt1 ↓    Foxo3 ↑    longevity ↑

Rictor ↓    c\_mTORC2 Akt1 ↓    Foxo3 ↑    longevity ↑

Foxo1 ↓    Sirt1 ↓    E2f1 ↑    Sirt1 ↑    Foxo3 ↑    longevity ↑
